# Supplementary material for: Identification of a DNA Repair Gene Signature and Establishment of a Prognostic Nomogram Predicting Biochemical-Recurrence-Free Survival of Prostate Cancer
Source: Front Mol Biosci. 2021 Mar 11;8:608369. doi: 10.3389/fmolb.2021.608369 (PMC7991107; doi:10.3389/fmolb.2021.608369)
Supplement: Supplementary file 6 [file table1.xlsx]

## Sheet: Sheet1
patient id	pathologic_T	gleason_score	age	PSA	Recurrence
TCGA-J4-A67Q	T2c	6	77	1.7	0
TCGA-KK-A8IK	T2c	9	56	1.7	0
TCGA-G9-6373	T3a	7	68	1.8	0
TCGA-ZG-A8QW	T3b	9	72	1.9	0
TCGA-ZG-A9N3	T3b	9	73	1.9	0
TCGA-HC-A9TE	T3b	9	64	1.9	1
TCGA-EJ-A46E	NA	8	57	2	0
TCGA-EJ-7321	T3a	6	57	2.2	0
TCGA-HI-7169	T3a	7	55	2.2	0
TCGA-2A-A8VX	T3b	8	70	2.4	0
TCGA-ZG-A9M4	T3b	9	65	2.5	0
TCGA-2A-A8VL	T2b	6	51	2.7	0
TCGA-EJ-5501	T3b	7	55	2.7	0
TCGA-HC-7230	T2c	7	50	3	0
TCGA-V1-A8WW	T3b	9	59	3.1	1
TCGA-J4-AAU2	T2c	6	59	3.2	0
TCGA-ZG-A9LS	T3b	9	64	3.2	0
TCGA-G9-6342	T3a	6	61	3.3	0
TCGA-VN-A88Q	T2c	8	60	3.3	0
TCGA-KK-A8IC	T3b	9	54	3.3	1
TCGA-ZG-A9LM	T3a	9	72	3.4	0
TCGA-QU-A6IM	T2a	7	59	3.5	0
TCGA-EJ-7781	T2c	7	65	3.5	0
TCGA-HC-7747	T2c	7	52	3.5	0
TCGA-J4-A67K	T2c	7	68	3.5	0
TCGA-KK-A59Z	T2c	7	66	3.5	0
TCGA-HC-8213	T2c	6	48	3.6	0
TCGA-M7-A720	T2c	6	53	3.6	0
TCGA-G9-6377	T2c	7	61	3.6	0
TCGA-EJ-7115	T3a	7	65	3.6	0
TCGA-HC-A9TH	T3b	9	58	3.6	1
TCGA-HC-7231	T2c	7	66	3.7	0
TCGA-HC-7750	T2c	7	50	3.7	0
TCGA-KK-A59V	T3b	9	64	3.7	0
TCGA-EJ-AB20	T2c	6	61	3.8	0
TCGA-EJ-5494	T3a	7	50	3.8	0
TCGA-V1-A8MM	T3a	7	60	3.8	1
TCGA-EJ-5524	T3a	9	57	3.8	1
TCGA-KK-A7AV	T2c	7	58	3.9	0
TCGA-H9-A6BX	T2c	6	60	4	0
TCGA-EJ-5505	T2c	7	57	4	0
TCGA-XK-AAIR	T2c	8	75	4	0
TCGA-V1-A9ZR	T4	8	68	4	0
TCGA-EJ-5525	T2c	9	67	4	0
TCGA-HC-7080	T2a	7	66	4.1	0
TCGA-G9-6354	T2b	7	55	4.1	0
TCGA-EJ-5509	T2c	7	63	4.1	0
TCGA-EJ-7784	T2c	7	63	4.1	0
TCGA-G9-7525	T2c	7	64	4.1	0
TCGA-XK-AAIW	T3b	9	78	4.1	0
TCGA-XJ-A9DQ	T2a	6	48	4.2	0
TCGA-M7-A721	T2c	7	70	4.2	0
TCGA-HC-7749	T3a	7	70	4.2	0
TCGA-YL-A9WH	T3b	9	67	4.2	0
TCGA-V1-A9OL	T3b	9	65	4.2	1
TCGA-HC-8258	T2c	6	56	4.3	0
TCGA-J4-A83N	T2c	7	57	4.3	0
TCGA-KK-A7AY	T2c	7	60	4.3	0
TCGA-X4-A8KS	T2c	7	61	4.3	0
TCGA-EJ-7785	T3a	7	54	4.3	0
TCGA-KK-A7AZ	T3a	7	56	4.4	0
TCGA-VP-A87J	T3a	7	56	4.4	0
TCGA-HC-7744	T3b	7	46	4.4	0
TCGA-HC-7817	T3b	7	52	4.4	0
TCGA-QU-A6IP	T2a	6	66	4.5	0
TCGA-EJ-7786	T2c	7	62	4.5	0
TCGA-EJ-7791	T2c	7	67	4.5	0
TCGA-HC-7818	T2c	7	66	4.5	0
TCGA-KK-A7B1	T3a	7	65	4.5	0
TCGA-HC-7819	T2c	8	53	4.5	0
TCGA-V1-A9ZI	T3b	9	68	4.5	1
TCGA-2A-AAYO	T2c	6	57	4.6	0
TCGA-EJ-7792	T2c	7	53	4.6	0
TCGA-EJ-A7NF	T2c	7	56	4.6	0
TCGA-G9-6348	T2c	7	68	4.6	0
TCGA-HC-7738	T2c	7	58	4.6	1
TCGA-G9-6379	T3b	7	68	4.6	0
TCGA-G9-6363	T4	7	64	4.6	0
TCGA-J4-A83K	T2c	6	52	4.7	0
TCGA-HC-8262	T2c	8	57	4.7	0
TCGA-VP-A87C	T2c	7	67	4.8	0
TCGA-CH-5739	T3a	7	65	4.8	0
TCGA-V1-A9OH	T2b	8	63	4.8	0
TCGA-EJ-A7NH	T2c	7	56	4.9	0
TCGA-KK-A6DY	T2c	7	50	4.9	0
TCGA-V1-A9ZK	T3b	8	68	4.9	0
TCGA-2A-A8VO	T3a	6	57	5	0
TCGA-HC-A8D0	T2a	7	61	5	0
TCGA-EJ-5498	T2c	7	56	5	0
TCGA-G9-6369	T2c	7	55	5	0
TCGA-HC-7736	T2c	7	59	5	0
TCGA-TP-A8TV	T2c	7	62	5	0
TCGA-V1-A8WL	T3a	7	64	5	0
TCGA-EJ-A46D	T2c	8	53	5	0
TCGA-XK-AAJ3	T3a	8	56	5	0
TCGA-V1-A9O9	T3b	8	56	5	0
TCGA-HC-7075	T2a	6	63	5.1	0
TCGA-G9-6347	T2c	6	59	5.1	0
TCGA-G9-7519	T2c	7	58	5.1	0
TCGA-HC-8266	T3b	8	55	5.1	0
TCGA-CH-5790	T2c	7	64	5.2	0
TCGA-EJ-7794	T2c	7	67	5.2	0
TCGA-HC-7820	T2c	7	72	5.2	0
TCGA-QU-A6IL	T2c	7	64	5.2	0
TCGA-EJ-5499	T3a	7	61	5.2	0
TCGA-HC-8216	T3a	7	58	5.2	0
TCGA-TP-A8TT	T3a	7	64	5.2	0
TCGA-HC-8265	T3a	8	66	5.2	0
TCGA-V1-A9OA	T3b	9	61	5.2	0
TCGA-EJ-5502	T2c	7	50	5.3	0
TCGA-VN-A88I	T3a	8	59	5.3	0
TCGA-VP-AA1N	T3a	9	70	5.3	0
TCGA-EJ-7797	T2c	7	53	5.4	0
TCGA-VP-A87B	T2b	8	63	5.4	1
TCGA-V1-A8WN	T2c	6	47	5.5	0
TCGA-HC-8260	T2c	7	43	5.5	0
TCGA-J4-A67T	T2c	7	63	5.5	0
TCGA-G9-6361	T3a	7	61	5.5	0
TCGA-G9-6498	T3a	7	53	5.5	0
TCGA-HI-7168	T3b	9	62	5.5	1
TCGA-2A-A8VV	T2b	6	52	5.6	0
TCGA-EJ-5522	T2c	7	51	5.6	0
TCGA-EJ-7123	T2c	7	59	5.6	0
TCGA-VN-A88O	T2c	7	49	5.6	0
TCGA-HC-7742	T3a	7	58	5.6	1
TCGA-HI-7171	T3b	9	56	5.6	1
TCGA-YL-A9WX	T3b	9	68	5.6	1
TCGA-QU-A6IO	T2c	6	53	5.7	0
TCGA-YL-A9WI	T3a	9	63	5.7	0
TCGA-EJ-7315	T3a	7	68	5.8	0
TCGA-EJ-A65B	T3b	9	55	5.8	0
TCGA-KK-A7B3	T3b	9	62	5.8	1
TCGA-HC-7740	T2c	7	59	5.9	0
TCGA-VN-A88M	T2c	7	55	5.9	0
TCGA-EJ-5531	T3a	7	62	5.9	0
TCGA-V1-A9Z9	T2c	9	63	5.9	0
TCGA-KK-A7B0	T3b	9	67	5.9	0
TCGA-Y6-A8TL	T3a	6	65	6	0
TCGA-EJ-5512	T2c	7	46	6.1	0
TCGA-KK-A8IH	T3a	7	50	6.1	0
TCGA-XJ-A83F	T3a	7	67	6.1	0
TCGA-EJ-7314	T3b	7	62	6.1	0
TCGA-CH-5794	T2b	7	65	6.2	0
TCGA-J4-A6M7	T2c	7	53	6.2	0
TCGA-J4-A67M	T3a	7	55	6.2	0
TCGA-G9-6371	T2c	6	58	6.3	0
TCGA-HC-8256	T2c	7	53	6.3	0
TCGA-KK-A7AQ	T2c	7	62	6.3	0
TCGA-KK-A6E7	T3a	9	46	6.3	1
TCGA-V1-A9OF	T2c	6	49	6.4	0
TCGA-J4-A83J	T2c	7	68	6.4	0
TCGA-J4-A83I	T3a	7	63	6.4	0
TCGA-ZG-A8QX	T2c	6	56	6.5	0
TCGA-EJ-5496	T2c	7	59	6.5	0
TCGA-G9-6329	T2c	7	67	6.5	0
TCGA-VN-A88L	T2c	7	54	6.5	0
TCGA-EJ-7328	T3a	7	70	6.5	0
TCGA-CH-5746	T2c	7	57	6.6	0
TCGA-V1-A9OT	T2c	6	61	6.7	1
TCGA-KK-A6E2	T2c	7	54	6.7	0
TCGA-HC-7745	T3b	7	65	6.7	0
TCGA-EJ-A8FN	T2c	7	58	6.8	0
TCGA-G9-6351	T2c	7	51	6.8	0
TCGA-G9-7522	T2c	7	49	6.8	0
TCGA-XK-AAJP	T3a	7	66	6.8	0
TCGA-EJ-A65G	T2c	8	57	6.8	0
TCGA-EJ-A65M	T2c	6	65	6.9	0
TCGA-YL-A9WL	T3a	9	59	6.9	1
TCGA-HC-8259	T2a	6	50	7	0
TCGA-G9-7509	T2c	6	48	7	0
TCGA-EJ-7331	T2c	7	64	7	0
TCGA-KK-A8IM	T2c	7	55	7	0
TCGA-2A-A8W1	T3a	7	54	7	0
TCGA-J4-A67L	T3a	7	54	7.1	0
TCGA-M7-A71Z	T3a	7	62	7.1	0
TCGA-V1-A9ZG	T2c	9	64	7.1	0
TCGA-2A-A8W3	T3a	9	69	7.1	1
TCGA-EJ-5497	T2c	7	47	7.2	0
TCGA-H9-7775	T2c	7	68	7.2	0
TCGA-YL-A8SI	T3a	9	69	7.2	1
TCGA-V1-A9OQ	T3a	6	67	7.3	0
TCGA-EJ-5521	T3a	7	63	7.3	0
TCGA-HI-7170	T2c	6	58	7.4	0
TCGA-EJ-5508	T3a	7	65	7.4	0
TCGA-G9-6384	T3a	7	53	7.4	0
TCGA-EJ-5514	T2c	9	66	7.4	0
TCGA-HC-7748	T2a	6	60	7.5	0
TCGA-V1-A8ML	T2c	7	63	7.5	0
TCGA-KK-A8I4	T3b	7	64	7.5	1
TCGA-YL-A8SA	T3b	8	69	7.5	0
TCGA-J4-A6G3	T3b	8	57	7.5	1
TCGA-HC-7077	T3a	6	64	7.6	0
TCGA-KK-A8I5	T2b	7	55	7.6	0
TCGA-EJ-A8FS	T3a	7	66	7.6	0
TCGA-J4-A67N	T3a	7	61	7.6	1
TCGA-G9-6366	T3b	7	61	7.6	0
TCGA-KK-A8I8	T3b	9	69	7.6	0
TCGA-HC-7233	T2a	7	73	7.7	0
TCGA-J4-A67O	T2c	7	59	7.7	0
TCGA-EJ-5527	T3a	7	69	7.7	0
TCGA-HC-7081	T3b	9	62	7.7	0
TCGA-KK-A7AU	T3b	9	63	7.7	0
TCGA-VP-A87H	T3b	9	76	7.7	0
TCGA-G9-6343	T2c	7	62	7.8	0
TCGA-YL-A8SC	T3a	9	66	7.8	1
TCGA-YL-A9WK	T3b	9	63	7.8	1
TCGA-XK-AAIV	T3b	10	63	7.8	0
TCGA-EJ-AB27	T2c	6	51	7.9	0
TCGA-HC-7209	T2c	6	60	7.9	0
TCGA-FC-7708	T3a	7	52	7.9	0
TCGA-EJ-8474	T3a	8	69	7.9	0
TCGA-V1-A9Z8	T3b	9	59	7.9	0
TCGA-HC-7212	T2a	7	56	8	1
TCGA-XA-A8JR	T2c	7	68	8	0
TCGA-SU-A7E7	T2b	8	60	8	0
TCGA-EJ-7782	T2c	8	71	8	0
TCGA-EJ-A7NJ	T2c	8	59	8	0
TCGA-V1-A8WV	T3b	9	52	8	0
TCGA-CH-5771	T2c	7	63	8.1	0
TCGA-QU-A6IN	T2c	7	61	8.1	0
TCGA-XK-AAJT	T3a	7	75	8.1	0
TCGA-G9-6339	T3b	7	58	8.1	0
TCGA-HC-7752	T2c	7	61	8.2	0
TCGA-G9-6499	T3a	9	66	8.2	0
TCGA-ZG-A9KY	T4	9	73	8.2	0
TCGA-M7-A722	T3a	8	65	8.3	0
TCGA-2A-AAYU	T3a	6	56	8.4	0
TCGA-V1-A8WS	T3b	6	56	8.4	0
TCGA-VP-A876	T2c	8	46	8.4	0
TCGA-VN-A88P	T2c	7	60	8.5	0
TCGA-EJ-A7NK	T3a	7	58	8.5	0
TCGA-HC-A6AO	T2c	7	52	8.6	0
TCGA-J4-8200	T2c	7	47	8.6	0
TCGA-EJ-5504	T3a	7	65	8.6	1
TCGA-HC-8257	T3b	7	70	8.6	0
TCGA-ZG-A9LZ	T3b	9	66	8.6	0
TCGA-X4-A8KQ	T3b	9	65	8.6	1
TCGA-G9-6356	T3b	9	60	8.7	0
TCGA-V1-A9O5	T4	9	64	8.7	1
TCGA-HC-7210	T2a	7	74	8.9	0
TCGA-EJ-8472	T3a	8	63	8.9	0
TCGA-EJ-5507	T3b	9	54	8.9	0
TCGA-G9-A9S7	T3a	8	55	9	0
TCGA-WW-A8ZI	T2c	8	70	9.1	0
TCGA-EJ-A46F	T3b	8	57	9.1	0
TCGA-EJ-5530	T2c	7	61	9.2	0
TCGA-KK-A8I9	T3a	8	61	9.2	1
TCGA-KK-A6E5	T3b	7	63	9.4	0
TCGA-MG-AAMC	T3a	9	59	9.4	0
TCGA-ZG-A9L9	T3b	9	60	9.4	0
TCGA-EJ-5517	T2c	6	55	9.6	0
TCGA-HC-7232	T3b	9	66	9.6	1
TCGA-J4-A67R	T2c	7	65	9.7	0
TCGA-EJ-5511	T3a	7	55	9.7	0
TCGA-G9-7510	T3a	8	66	9.7	0
TCGA-EJ-A7NN	T3b	7	61	9.8	0
TCGA-CH-5752	T3a	8	66	9.8	0
TCGA-KK-A8IA	T3b	9	69	9.8	0
TCGA-CH-5738	NA	6	72	10	0
TCGA-VN-A88N	T2c	7	62	10.1	0
TCGA-CH-5791	T3a	7	72	10.1	0
TCGA-HC-A8D1	T2c	7	68	10.2	0
TCGA-V1-A9OX	T2c	8	56	10.2	0
TCGA-J4-A67S	T3a	7	63	10.3	1
TCGA-M7-A725	T3b	7	56	10.3	0
TCGA-J4-A83M	T2c	7	64	10.4	1
TCGA-G9-6336	NA	7	57	10.6	0
TCGA-VP-A87D	T3a	9	54	10.6	0
TCGA-V1-A8MG	T3b	7	53	10.7	0
TCGA-HC-A48F	T2c	8	47	10.7	0
TCGA-G9-6333	T2c	7	66	10.8	0
TCGA-EJ-5495	T3b	8	68	10.8	0
TCGA-HC-7211	T2c	7	62	10.9	0
TCGA-EJ-5516	T3a	7	49	10.9	0
TCGA-ZG-A9LU	T3a	9	67	11	0
TCGA-ZG-A9ND	T3a	9	55	11	0
TCGA-G9-6338	T3a	7	61	11.3	0
TCGA-G9-7523	T3a	10	44	11.3	0
TCGA-EJ-5532	T3a	7	57	11.4	0
TCGA-V1-A9OY	T3a	7	57	11.4	0
TCGA-YL-A8HJ	T3b	9	58	11.4	0
TCGA-CH-5767	T2c	7	66	11.6	0
TCGA-2A-AAYF	T3a	7	57	11.6	0
TCGA-G9-6365	T4	7	71	11.6	0
TCGA-VP-A87E	T2c	6	59	11.7	0
TCGA-G9-A9S4	T3b	8	62	11.7	0
TCGA-KK-A7B4	T3b	9	64	11.9	1
TCGA-VP-A878	T2c	9	58	12	1
TCGA-KK-A8ID	T3b	9	70	12	0
TCGA-V1-A8MF	T3a	6	65	12.1	0
TCGA-EJ-7327	T3b	7	61	12.2	0
TCGA-CH-5768	T3a	6	72	12.8	0
TCGA-EJ-7783	T3a	7	70	12.8	0
TCGA-ZG-A8QZ	T3b	9	65	13	0
TCGA-VN-A943	T2c	8	71	13.1	0
TCGA-CH-5750	T2c	7	72	13.2	0
TCGA-VP-A875	T3a	7	67	13.4	0
TCGA-HC-7213	T3b	9	53	13.5	1
TCGA-VN-A88R	T2c	8	53	13.6	1
TCGA-KK-A6E0	T3a	9	59	13.9	0
TCGA-TK-A8OK	NA	7	73	14	0
TCGA-EJ-7317	T2c	7	71	14	0
TCGA-EJ-8470	T2c	7	58	14.1	0
TCGA-ZG-A9L1	T3b	9	66	14.2	0
TCGA-HC-8261	T2c	7	48	14.4	0
TCGA-Y6-A9XI	NA	8	72	14.4	0
TCGA-G9-6332	T3a	7	55	14.7	1
TCGA-KK-A59Y	T3a	9	56	14.7	0
TCGA-CH-5763	T3a	7	66	14.8	0
TCGA-EJ-7789	T3a	7	66	14.9	0
TCGA-EJ-5519	T3b	8	64	15	0
TCGA-KK-A8IG	T3a	7	55	15.1	0
TCGA-YL-A8HM	T3b	9	66	15.2	1
TCGA-EJ-5510	T2c	7	48	15.3	0
TCGA-YL-A9WY	T3b	9	57	15.4	1
TCGA-M7-A724	T3a	8	64	15.6	0
TCGA-XQ-A8TB	T3b	9	67	16.2	0
TCGA-EJ-8469	T3a	9	46	16.3	1
TCGA-KK-A8I7	T3b	9	55	16.4	1
TCGA-YL-A8S9	T3a	9	63	17	0
TCGA-YL-A8HK	T3b	9	59	17	1
TCGA-V1-A8MU	T3a	7	56	17.2	1
TCGA-CH-5762	T3b	7	60	17.2	0
TCGA-YL-A8S8	T3a	9	68	17.7	1
TCGA-J4-8198	T3b	7	49	17.9	0
TCGA-HC-7737	T2c	7	55	18.1	0
TCGA-J4-A83L	T2c	7	61	19	0
TCGA-ZG-A9MC	T3b	9	69	19	0
TCGA-FC-A6HD	T3a	7	77	19.1	0
TCGA-EJ-5542	T3a	7	60	19.3	0
TCGA-CH-5788	T3b	7	69	19.4	0
TCGA-ZG-A8QY	T3b	9	67	21.3	0
TCGA-EJ-A6RA	T3b	8	70	21.5	0
TCGA-YL-A8HO	T3a	7	67	21.8	1
TCGA-ZG-A9LB	T3b	9	72	22	0
TCGA-CH-5751	T4	10	68	22.6	0
TCGA-G9-6496	T2c	7	61	23.1	0
TCGA-XK-AAJR	T3a	7	61	24.4	1
TCGA-CH-5772	T3a	9	63	24.6	0
TCGA-FC-7961	T3a	9	62	24.7	0
TCGA-HC-7078	T3a	7	69	25	0
TCGA-EJ-A65F	T3b	9	59	25	0
TCGA-EJ-8468	T3a	8	63	25.4	0
TCGA-KK-A6E1	T3b	9	57	25.6	0
TCGA-H9-A6BY	T3a	7	63	26	0
TCGA-YL-A8HL	T3b	9	58	26.1	0
TCGA-G9-7521	T3a	8	52	26.3	0
TCGA-KK-A59X	T3b	9	55	26.3	0
TCGA-EJ-7125	T2c	7	44	26.6	0
TCGA-EJ-7788	T3b	7	53	26.6	0
TCGA-ZG-A9L4	T3b	9	61	26.6	0
TCGA-ZG-A9LY	T3b	9	60	26.7	0
TCGA-FC-A5OB	T3b	9	53	26.9	0
TCGA-XJ-A9DX	T3b	9	51	27.2	1
TCGA-CH-5741	T3b	9	56	28	0
TCGA-ZG-A9NI	T3b	9	73	28	0
TCGA-V1-A9Z7	T3b	9	54	28.1	0
TCGA-EJ-5526	T3a	8	56	28.6	1
TCGA-EJ-A65J	T3a	9	62	30.7	0
TCGA-YL-A8SB	T3a	9	62	30.8	1
TCGA-XJ-A83G	T3b	7	51	31	0
TCGA-HC-7821	T3b	8	54	31	1
TCGA-ZG-A9L2	T3b	9	70	31.3	0
TCGA-ZG-A9L5	T4	9	58	33.4	0
TCGA-G9-6362	T3a	7	57	33.7	1
TCGA-EJ-5518	T4	9	66	36	1
TCGA-CH-5765	T3a	7	55	37.9	0
TCGA-ZG-A9L0	T3b	9	71	38	0
TCGA-2A-A8VT	T4	9	47	44.9	0
TCGA-V1-A8X3	T2c	7	51	45.1	0
TCGA-VN-A88K	T3a	8	58	51.1	0
TCGA-FC-A4JI	T3a	8	70	51.7	0
TCGA-V1-A9O7	T3a	9	60	64.1	1
TCGA-ZG-A9LN	T3b	9	57	68	0
TCGA-ZG-A9L6	T3b	9	64	76.5	0
TCGA-FC-A8O0	T3a	6	68	82	0
TCGA-G9-6494	T4	7	66	87	0
TCGA-YL-A9WJ	T3b	8	47	107	1
TCGA-EJ-7218	T2c	7	71	NA	0
TCGA-XK-AAK1	T2c	7	62	NA	0
TCGA-EJ-7318	T3a	7	51	NA	0
TCGA-G9-6364	T3a	7	72	NA	0
TCGA-EJ-7312	T3b	7	58	NA	0
TCGA-EJ-7325	T3b	7	63	NA	0
TCGA-YL-A8SL	T3b	8	74	NA	0
TCGA-YL-A8SO	T3a	9	64	NA	0
TCGA-YL-A8SR	T3a	9	64	NA	0
TCGA-YL-A8SK	T3b	9	67	NA	0
TCGA-YL-A8SJ	T3b	9	60	NA	1
TCGA-YL-A8SP	T3b	9	58	NA	1
TCGA-YL-A8SQ	T3b	9	61	NA	1
