# Supplementary material for: Identification of a DNA Repair Gene Signature and Establishment of a Prognostic Nomogram Predicting Biochemical-Recurrence-Free Survival of Prostate Cancer
Source: Front Mol Biosci. 2021 Mar 11;8:608369. doi: 10.3389/fmolb.2021.608369 (PMC7991107; doi:10.3389/fmolb.2021.608369)
Supplement: Supplementary file 7 [file table2.xlsx]

## Sheet: Supplement Table 3 Outcomes of 
gene	HR	z	pValue
POLM	4.81786	4.45417	8.42e-06
AEN	0.423479	-4.2478	2.16e-05
HELQ	0.174182	-4.21939	2.45e-05
NUDT15	0.354024	-4.0782	4.54e-05
EME2	1.75489	4.0365	5.43e-05
PLRG1	0.146924	-3.7751	0.000159941
POLQ	1.45461	3.62219	0.000292118
RAD51C	0.270094	-3.55421	0.000379116
XRCC2	1.68711	3.53636	0.000405685
GTF2H4	2.92032	3.42944	0.000604822
MUS81	3.9882	3.42745	0.00060928
RAD54L	1.48536	3.40542	0.000660618
TP53	0.691974	-3.30973	0.000933854
CLK2	2.53791	3.29571	0.000981744
UVSSA	1.96795	3.28013	0.00103759
ALKBH1	0.369223	-3.27901	0.00104171
EME1	1.52156	3.19234	0.00141125
MRPL40	0.45438	-3.19203	0.00141276
PARPBP	1.62035	3.14647	0.00165257
CDC25C	1.41193	3.03566	0.00240009
RRM2	1.37339	3.01148	0.00259977
UIMC1	4.08526	3.00563	0.00265028
TDP2	0.419367	-2.94908	0.00318725
NFATC2IP	4.16081	2.86467	0.00417448
ERCC1	0.37984	-2.8446	0.00444668
RTEL1	1.66563	2.81169	0.0049282
FANCA	1.51895	2.80887	0.00497153
EXO1	1.36328	2.78095	0.00541994
RAD52	2.24747	2.74907	0.00597651
RPA1	0.405762	-2.62901	0.00856336
FANCC	1.97441	2.61445	0.00893701
PARP3	1.83879	2.61164	0.00901081
RAD17	0.46741	-2.5904	0.00958647
NUDT18	0.618661	-2.58455	0.00975053
XRCC6	0.332774	-2.57942	0.00989658
RDM1	1.2866	2.51348	0.0119547
YWHAE	0.433349	-2.50865	0.0121193
NEIL1	1.4793	2.50633	0.0121993
TTK	1.33022	2.47755	0.0132288
UBE2T	1.45838	2.47575	0.0132956
CDC25B	1.71708	2.47112	0.0134691
POLD4	0.568723	-2.46882	0.0135558
GTF2H5	0.477147	-2.44322	0.0145569
SWSAP1	0.529019	-2.43429	0.0149212
HMGB2	1.56101	2.39324	0.0167003
DCLRE1B	1.91563	2.37253	0.0176667
POLL	0.487817	-2.36425	0.0180666
SETMAR	0.437435	-2.35574	0.0184856
DDB2	0.617997	-2.32095	0.0202894
NEIL3	1.25842	2.31133	0.0208144
APEX2	0.360375	-2.2748	0.0229181
NSMCE1	0.644503	-2.27196	0.0230889
SLX1B	1.34629	2.23134	0.0256584
PARP2	2.53204	2.21208	0.0269608
BLM	1.40575	2.16785	0.0301701
ERCC8	0.493369	-2.13437	0.0328128
CUL4A	0.507327	-2.09947	0.0357758
POLE4	0.591334	-2.03834	0.0415155
KAT5	0.487822	-2.03626	0.041724
TELO2	1.65374	2.02135	0.0432434
POLG	2.09933	2.01833	0.0435571
FANCL	0.462051	-2.01498	0.0439073
DNA2	1.41067	2.01106	0.0443196
MSH3	0.659569	-2.00775	0.0446695
GTF2H1	0.414897	-2.0049	0.0449735
FANCB	1.37628	1.98644	0.0469847
MDC1	1.84625	1.9727	0.0485293
